# Supplementary material for: Activator-free oxidative homocoupling of organosilanes catalysed by a palladium–DPPP complex
Source: Royal Society of Chemistry journal article supplement (doi:10.1039/b303852a), 2003-01-01
Supplement: b303852a.doc [file b303852a.doc]

**Activator-free oxidative homocoupling of organosilanes catalysed by a palladium–DPPP complex**

**Hiroto Yoshida,* Yasuhito Yamaryo, Joji Ohshita and Atsutaka Kunai***

*Department of Applied Chemistry, Graduate School of Engineering, Hiroshima University, Higashi-Hiroshima 739-8527, Japan.*

*E-mail: yhiroto@hiroshima-u.ac.jp, akunai@hiroshima-u.ac.jp*

**Supplementary Information**

**General Remarks.** All manipulations of oxygen- and moisture-sensitive materials were conducted under a purified argon atmosphere, except for the homocoupling. Nuclear magnetic resonance spectra were taken on a JEOL EX-270 (1H, 270 MHz; 13C, 67.8 MHz; 29Si, 53.7 MHz) spectrometer using residual chloroform (1H) or CDCl3 (13C) as an internal standard and tetramethylsilane (29Si) as an external standard. The preparative recycling gel permeation chromatography was performed with GL Science PU 614 equipped with Shodex GPC H-2001L and -2002L columns (benzene as an eluent). Column chromatography was carried out using Merck Kieselgel 60. Unless otherwise noted, commercially available reagents were used without purification. DMSO and DMF were distilled from calcium hydride. THF, toluene and diethyl ether were distilled from sodium/benzophenone ketyl. Pentane was distilled from phosphorus pentoxide. Dimethyl(phenyl)silanol (**1d**),[[1]](#endnote-2) 4-methoxyphenyl(dimethyl)silanol (**1e**),1 dimethyl(*p*-tolyl)silanol (**1f**),1 4-*tert*-butylphenyl(dimethyl)silanol (**1g**),1,[[2]](#endnote-3) [4-(trifluoromethyl)phenyl](dimethyl)silanol (**1i**)1 and dimethyl(*o*-tolyl)silanol (**1p**)1 were synthesized according to literature procedures.

**Preparation of alkynyl(dimethoxy)methylsilane.** To a solution of an alkyne (0.033 mol) in THF (30 mL) was added dropwise butyllithium (1.6 M in hexanes, 19 mL, 0.030 mol) at 0 °C, and the reaction mixture was stirred for 4 h at 0 °C. Then the mixture was added dropwise to a solution of (trimethoxy)methylsilane (13 mL, 0.090 mol) in ether (17 mL) at –78 °C. The resulting mixture was allowed to warm slowly to room temperature and stirred overnight before addition of chloro(trimethyl)silane (3.8 mL, 0.030 mol) at 0 °C. After the mixture was stirred for 1 h at 0 °C, the solvent was removed by distillation. To the mixture was added pentane (60 mL). The mixture was stirred for 0.5 h, and filtered through a Celite plug. Evaporation of the solvent followed by distillation gave an alkynyl(dimethoxy)methylsilane.

**Dimethoxy(methyl)(phenylethynyl)silane** (**1a**).[[3]](#endnote-4) A colorless oil, bp 84 °C (1 mmHg), 47% yield: 1H NMR (CDCl3) 0.33 (s, 3 H), 3.64 (s, 6 H), 7.27-7.42 (m, 3 H), 7.44-7.58 (m, 2 H);13C NMR (CDCl3) -3.2, 50.9, 87.4, 104.7, 122.0, 128.3, 129.2, 132.3; 29Si NMR (CDCl3) -30.1.

**Dimethoxy(methyl)[(1-naphthyl)ethynyl]silane** (**1b**). A colorless oil, bp 116 °C (1 mmHg), 19% yield: 1H NMR (CDCl3) 0.43 (s, 3 H), 3.73 (s, 6 H), 7.30-7.67 (m, 3 H), 7.68-7.96 (m, 3 H), 8.39 (d, *J* = 8.3 Hz, 1 H);13C NMR (CDCl3) -3.0, 51.0, 92.6, 102.8, 119.7, 125.0, 126.0, 126.5, 127.1, 128.3, 129.7, 131.6, 133.0, 133.4; 29Si NMR (CDCl3) -30.1; Anal. Calcd for C15H16O2Si: C, 70.27; H, 6.29. Found: C, 70.29; H, 6.25.

**[(1-Cyclohexenyl)ethynyl]dimethoxy(methyl)silane** (**1c**). A colorless oil, bp 87 °C (1 mmHg), 42% yield: 1H NMR (CDCl3) 0.25 (s, 3 H), 1.45-1.72 (m, 4 H), 1.97-2.23 (m, 4 H), 3.58 (s, 6 H), 6.20-6.33 (m, 1 H);13C NMR (CDCl3) -3.2, 21.3, 22.1, 25.7, 28.8, 50.8, 84.3, 107.1, 120.1, 138.0; 29Si NMR (CDCl3) -29.9; Anal. Calcd for C11H18O2Si: C, 62.81; H, 8.63. Found: C, 62.63; H, 8.60.

**Preparation of aryl(dimethyl)silanols.** All new arylsilanols were synthesized from hexamethyltrisiloxane with the corresponding aryllithium in a similar manner as reported.1,[[4]](#endnote-5)

**4-Fluorophenyl(dimethyl)silanol** (**1h**) A colorless oil, bp 65 °C (bath temp., 1 mmHg), 87% yield: 1H NMR (CDCl3) 0.38 (s, 6 H), 2.35 (brs, 1 H), 7.00-7.12 (m, 2 H), 7.55 (dd, *J* = 8.6, 6.3 Hz, 2 H);13C NMR (CDCl3) 0.0, 114.6 (d, *J* = 19.5 Hz), 134.6 (d, *J* = 3.7 Hz), 135.1 (d, *J* = 7.3 Hz), 164.0 (d, *J* = 249.1 Hz); 29Si NMR (CDCl3) 7.6; Anal. Calcd for C8H11FOSi: C, 56.44; H, 6.51. Found: C, 56.27; H, 6.72.

**3-Methoxyphenyl(dimethyl)silanol** (**1j**) A colorless oil, bp 120 °C (bath temp., 1 mmHg), 79% yield: 1H NMR (CDCl3) 0.40 (s, 6 H), 2.22 (brs, 1 H), 3.82 (s, 3 H), 6.94 (ddd, *J* = 8.0, 2.6, 1.0 Hz, 1 H), 7.10-7.21 (m, 2 H), 7.33 (t, *J* = 8.0 Hz, 1 H);13C NMR (CDCl3) -0.1, 55.1, 115.0, 118.3, 125.2, 129.1, 140.7, 159.0; 29Si NMR (CDCl3) 7.7; Anal. Calcd for C9H14O2Si: C, 59.30; H, 7.74. Found: C, 59.33; H, 7.87.

**Dimethyl(*m*-tolyl)silanol** (**1k**) A colorless oil, bp 100 °C (bath temp., 1 mmHg), 88% yield: 1H NMR (CDCl3) 0.41 (s, 6 H), 2.09 (brs, 1 H), 2.38 (s, 3 H), 7.19-7.34 (m, 2 H), 7.36-7.46 (m, 2 H);13C NMR (CDCl3) 0.0, 21.5, 127.8, 130.0, 130.4, 133.7, 137.3, 139.0; 29Si NMR (CDCl3) 7.8; Anal. Calcd for C9H14OSi: C, 65.00; H, 8.49. Found: C, 65.08; H, 8.73.

**Dimethyl(3,5-dimethylphenyl)silanol** (**1l**) A colorless oil, bp 90 °C (bath temp., 1 mmHg), 83% yield: 1H NMR (CDCl3) 0.40 (s, 6 H), 1.85 (brs, 1 H), 2.34 (s, 6 H), 7.06 (d, *J* = 0.7 Hz, 1 H), 7.22 (d, *J* = 0.7 Hz, 2 H);13C NMR (CDCl3) 0.0, 21.3, 130.7, 131.4, 137.3, 138.9; 29Si NMR (CDCl3) 8.0; Anal. Calcd for C10H16OSi: C, 66.61; H, 8.94. Found: C, 66.63; H, 9.11.

**Dimethyl(3,4-methylenedioxyphenyl)silanol** (**1m**) A colorless oil, bp 110 °C (bath temp., 1 mmHg), 83% yield: 1H NMR (CDCl3) 0.36 (s, 6 H), 2.37 (brs 1 H), 5.94 (s, 2 H), 6.85 (d, *J* = 7.6 Hz, 1 H), 7.03 (brs, 1 H), 7.07 (dd, *J* = 7.6, 1.0 Hz, 1 H);13C NMR (CDCl3) 0.0, 100.5, 108.6, 112.4, 127.2, 132.2, 147.3, 148.8; 29Si NMR (CDCl3) 7.9; Anal. Calcd for C9H12O3Si: C, 55.07; H, 6.16. Found: C, 54.93; H, 6.20.

**Dimethyl(2-naphthyl)silanol** (**1n**) A colorless oil, bp 130 °C (bath temp., 1 mmHg), 70% yield: 1H NMR (CDCl3) 0.49 (s, 6 H), 2.20 (brs, 1 H), 7.45-7.58 (m, 2 H), 7.66 (dd, *J* = 8.3, 1.0 Hz, 1 H), 7.79-7.92 (m, 3 H), 8.10 (brs, 1 H);13C NMR (CDCl3) 0.1, 126.0, 126.6, 127.2, 127.7, 128.2, 129.1, 132.8, 133.9, 134.0, 136.5; 29Si NMR (CDCl3) 7.8; Anal. Calcd for C12H14OSi: C, 71.24; H, 6.97. Found: C, 71.22; H, 6.99.

**2-Methoxyphenyl(dimethyl)silanol** (**1o**) A colorless oil, bp 100 °C (bath temp., 1 mmHg), 82% yield: 1H NMR (CDCl3) 0.40 (s, 6 H), 2.39 (brs, 1 H), 3.85 (s, 3 H), 6.87 (d, *J* = 8.3 Hz 1 H), 7.00 (td, *J* = 7.3, 0.7 Hz, 1 H), 7.32-7.50 (m, 2 H);13C NMR (CDCl3) 0.3, 55.2, 109.6, 120.8, 126.8, 131.3, 134.5, 163.8; 29Si NMR (CDCl3) 8.3; HRMS Calcd for C9H14O2Si: M+, 182.0763. Found: *m*/*z* 182.0744.

**2-Benzofuryl(dimethyl)silanol** (**1q**) A pale yellow needle, mp 43-45 °C, bp 110 °C (bath temp., 1 mmHg), 71% yield: 1H NMR (CDCl3) 0.46 (s, 6 H), 2.60 (brs, 1 H), 7.03 (d, *J* = 0.7 Hz, 1 H), 7.20 (ddd, *J* = 7.9, 7.3, 1,3 Hz, 1 H), 7.28 (ddd, *J* = 7.6, 7.3, 1,3 Hz, 1 H), 7.49 (d, *J* = 7.9 Hz, 1 H), 7.56 (ddd, *J* = 7.6, 0.7, 0.7 Hz, 1 H);13C NMR (CDCl3) -0.5, 111.4, 116.8, 121.3, 122.5, 124.8, 127.6, 157.9, 161.3; 29Si NMR (CDCl3) 0.5; Anal. Calcd for C10H12O2Si: C, 62.46; H, 6.29. Found: C, 62.45; H, 6.24.

**Dimethyl[(4-trimethylsilyl)phenyl]silanol** (**1r**) A colorless crystal, mp 55-58 °C, bp 140 °C (bath temp., 1 mmHg), 93% yield: 1H NMR (CDCl3) 0.28 (s, 9 H), 0.41 (s, 6 H), 1.75 (brs, 1 H), 7.55 (dd, *J* = 7.4, 0.1 Hz, 2 H), 7.60 (dd, *J* = 7.4, 0.1 Hz, 2 H);13C NMR (CDCl3) -1.3, -0.1, 132.3, 132.8, 139.5, 142.2; 29Si NMR (CDCl3) -4.0, 7.9; Anal. Calcd for C11H20OSi2: C, 58.86; H, 8.98. Found: C, 58.58; H, 8.98.

**Dimethyl[(3-trimethylsilyl)phenyl]silanol** (**1s**) A colorless oil, bp 100 °C (bath temp., 1 mmHg), 51% yield: 1H NMR (CDCl3) 0.30 (s, 9 H), 0.43 (s, 6 H), 1.95 (brs, 1 H), 7.38 (td, *J* = 7.4, 0.7 Hz, 1 H), 7.54-7.65 (m, 2 H), 7.72 (dd, *J* = 2.3, 1.3 Hz, 1 H);13C NMR (CDCl3) -1.1, 0.0, 127.2, 133.5, 134.7, 137.8, 138.1, 139.8; 29Si NMR (CDCl3) -4.0, 8.0; Anal. Calcd for C11H20OSi2: C, 58.86; H, 8.98. Found: C, 58.85; H, 9.13.

**Homocoupling of Alkynylsilanes. *A General Procedure.*** A DMSO solution (1.3 mL) of 1,3-bis(diphenylphosphino)propane (8.2 mg, 0.020 mmol) and Pd(OAc)2 (2.9 mg, 0.013 mmol) was degassed through two freeze-thaw cycles, and the reaction flask was charged with oxygen. To this solution was added an alkynylsilane (0.27 mmol) and the resulting mixture was stirred at 70 °C for 12 h. The mixture was diluted with ether, washed with water and dried over magnesium sulfate. Evaporation of the solvent followed by silica-gel column chromatography (hexane as an eluent) or gel permeation chromatography (benzene as an eluent) gave the corresponding product.

**1,4-Diphenyl-1,3-butadiyne (2a).** Isolated by silica-gel column chromatography (hexane as an eluent).

**1,4-Di(1-naphthyl)-1,3-butadiyne (2b).**[[5]](#endnote-6)Isolated by gel permeation chromatography.

**1,4-Di(1-cyclohexenyl)-1,3-butadiyne (2c).**[[6]](#endnote-7)Isolated by silica-gel column chromatography (hexane as an eluent).

**Homocoupling of Arylsilanols. *A General Procedure.*** A DMSO solution (1.0 mL) of 1,3-bis(diphenylphosphino)propane (8.2 mg, 0.020 mmol) and Pd(OAc)2 (2.9 mg, 0.013 mol) was degassed through two freeze-thaw cycles, and the reaction flask was charged with oxygen. To this solution was added an arylsilanol (0.27 mmol) and water (0.3 mL), and the resulting mixture was stirred at 100 °C for the period as specified in Table 2. The mixture was diluted with ether, washed with water and dried over magnesium sulfate. Evaporation of the solvent followed by silica-gel column chromatography (hexane or hexane-ethyl acetate as an eluent) or gel permeation chromatography (benzene as an eluent) gave the corresponding product.

**Biphenyl (2d).** Isolated by gel permeation chromatography.

**4,4’-Dimethoxybiphenyl (2e).** Isolated by silica-gel column chromatography (10% ethyl acetate/hexane as an eluent).

**4,4’-Dimethylbiphenyl (2f).** Isolated by gel permeation chromatography.

**4,4’-Di-*tert*-butylbiphenyl (2g).** Isolated by silica-gel column chromatography (hexane as an eluent).

**4,4’-Difluorobiphenyl (2h).** Isolated by silica-gel column chromatography (hexane as an eluent).

**4,4’-Bis(trifluoromethyl)biphenyl (2i).** Isolated by gel permeation chromatography.

**3,3’-Dimethoxybiphenyl (2j).** Isolated by silica-gel column chromatography (10% ethyl acetate/hexane as an eluent).

**3,3’-Dimethylbiphenyl (2k).** Isolated by silica-gel column chromatography (hexane as an eluent).

**3,3’,5,5’-Tetramethylbiphenyl (2l).** Isolated by silica-gel column chromatography (hexane as an eluent).

**3,4,3’,4’-Bis(methylenedioxy)biphenyl (2m).**[[7]](#endnote-8)Isolated by silica-gel column chromatography (10% ethyl acetate/hexane as an eluent).

**2,2’-Binaphthyl (2n).**[[8]](#endnote-9)Isolated by silica-gel column chromatography (10% ethyl acetate/hexane as an eluent).

**2,2’-Dimethoxybiphenyl (2o).** Isolated by gel permeation chromatography.

**2,2’-Dimethylbiphenyl (2p).** Isolated by silica-gel column chromatography (hexane as an eluent).

**2,2’-Bibensofuranyl (2q).**[[9]](#endnote-10)Isolated by crystallization from hexane.

**4,4’-Bis(trimethylsilyl)biphenyl (2r).**[[10]](#endnote-11)Isolated by silica-gel column chromatography (hexane as an eluent).

**3,3’-Bis(trimethylsilyl)biphenyl (2s).** Isolated by silica-gel column chromatography (hexane as an eluent): A colorless oil; 1H NMR (CDCl3) 0.34 (s, 18 H), 7.47 (t, *J* = 7.4 Hz, 2 H), 7.52-7.66 (m, 4 H), 7.74 (brs, 2 H);13C NMR (CDCl3) -1.1, 127.9, 128.1, 132.2, 132.3, 141.0; 29Si NMR (CDCl3) -3.7; HRMS Calcd for C18H26Si2: M+, 298.1573. Found: *m*/*z* 298.1587.

Homocoupling products **2a**, **2d**–**2l**, **2o** and **2p** were identical to authentic materials (Aldrich, Lancaster or Acros Organics). Other products except for **2s** were identified by the reported data.

1. K. Hirabayashi, J.-i. Ando, J. Kawashima, Y. Nishihara, A. Mori and T. Hiyama, *Bull. Chem. Soc. Jpn.*, 2000, **73**, 1409. [↑](#endnote-ref-2)
2. V. A. Drozdov, A. P. Kreshkov and V. N. Knyazev, *Zh. Obshch. Khim.*, 1968, **38**, 1831. [↑](#endnote-ref-3)
3. J. Chmielecka, J. Chojnowski, C. Eaborn and W. A. Stanczyk, *J. Chem. Soc., Perkin Trans. 2*, 1985, 1779. [↑](#endnote-ref-4)
4. S. M. Sieburth and L. Fensterbank, *J. Org. Chem.*, 1993, **58**, 6314. [↑](#endnote-ref-5)
5. K. Nakasuji, S. Akiyama, K. Akashi and M. Nakagawa, *Bull. Chem. Soc. Jpn.,* 1970, **43**, 3567. [↑](#endnote-ref-6)
6. A. Lei, M. Srivastava and X. Zhang, *J. Org. Chem.*, 2002, **67**, 1969. [↑](#endnote-ref-7)
7. V. Courtois, R. Barhdadi, M. Troupel and J. Périchon, *Tetrahedron,* 1997, **53**, 11569. [↑](#endnote-ref-8)
8. N. G. Andersen, S. P. Maddaford and B. A. Keay, *J. Org. Chem.*, 1996, **61**, 9556. [↑](#endnote-ref-9)
9. Y. Fort, S. Becker and P. Caubere, *Tetrahedron,* 1994, **50**, 11893. [↑](#endnote-ref-10)
10. M. D. Curtis and A. L. Allred, *J. Am. Chem. Soc.*, 1965, **87**, 2554. [↑](#endnote-ref-11)
